# Supplementary material for: Investigating the Role of African Horse Sickness Virus VP7 Protein Crystalline Particles on Virus Replication and Release
Source: MDPI journal article supplement (doi:10.3390/v14102193), 2022-10-04
Supplement: s1 [file s1]

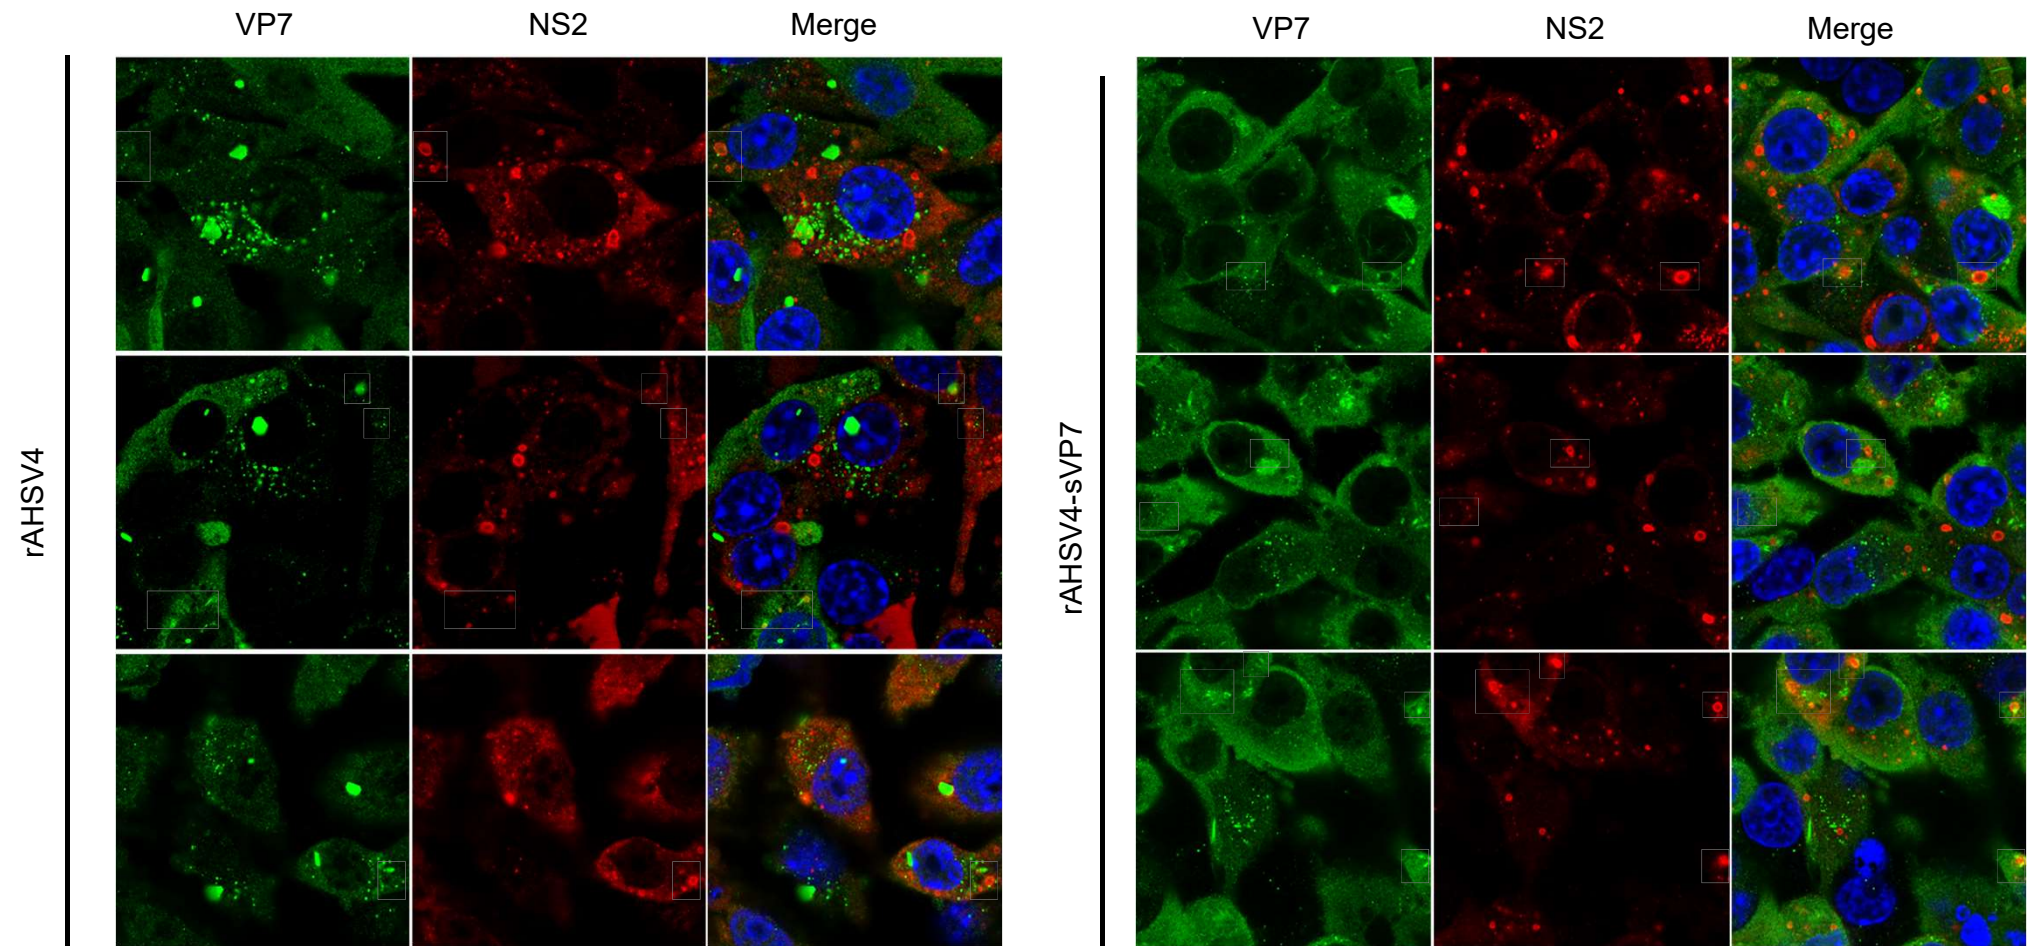

Figure S3. Further examples of the intracellular distribution of AHSV VP7 with viral inclusion body mediator protein NS2 in wild-type rAHSV4 (left) and mutant rAHSV4-sVP7 (right). Boxes indicate VP7 foci association alongside VIBs.
