# Supplementary material for: Investigating the Role of African Horse Sickness Virus VP7 Protein Crystalline Particles on Virus Replication and Release
Source: MDPI journal article supplement (doi:10.3390/v14102193), 2022-10-04
Supplement: s1 [file s1]

rAHSV4

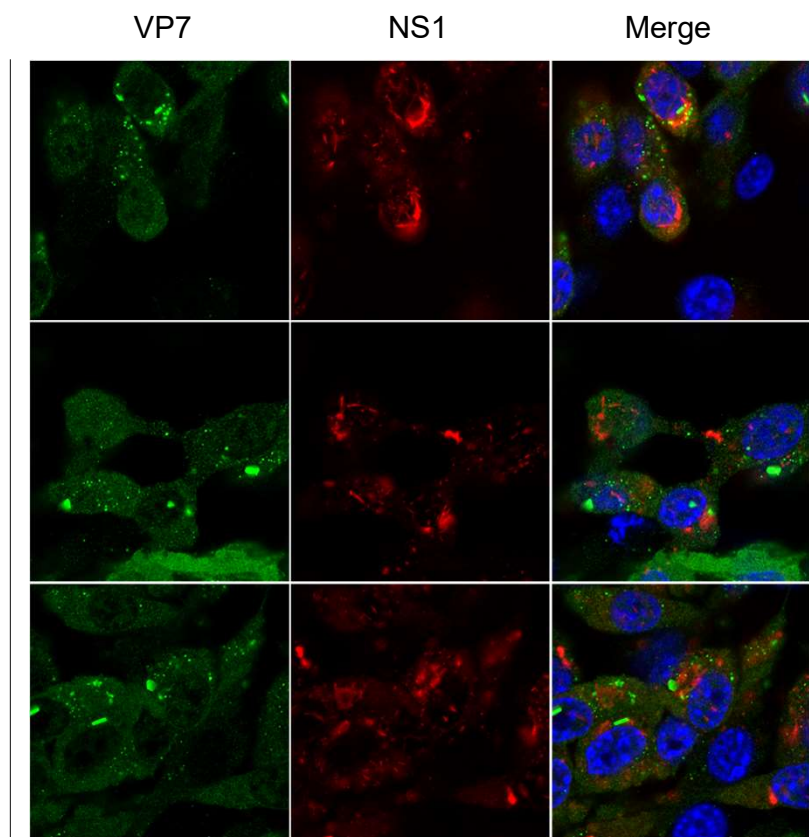

rAHSV4-sVP7

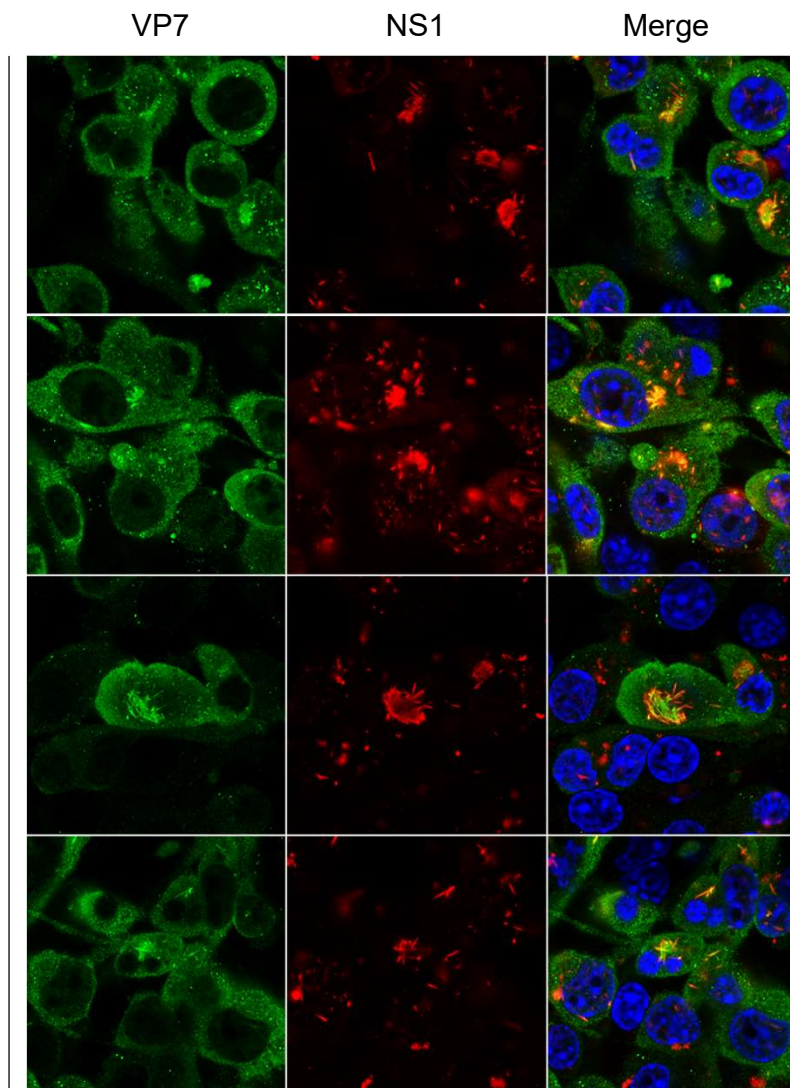

Figure S4. Further examples of the intracellular distribution and colocalisation of AHSV VP7 with AHSV tubule-forming protein NS1 in wild-type rAHSV4 (left) and mutant rAHSV4-sVP7 (right).
