# Supplementary material for: Investigating the Role of African Horse Sickness Virus VP7 Protein Crystalline Particles on Virus Replication and Release
Source: Viruses. 2022 Oct 4;14(10):2193. doi: 10.3390/v14102193 (PMC9608501; doi:10.3390/v14102193)
Supplement: Supplementary file 1 [file viruses-14-02193-s001.zip]

Archive with 4 entries (4 files):
- Figure S2.pdf
- Figure S3.pdf
- Figure S4.pdf
- Figure S1.pdf
